# Supplementary material for: Seasonal evolution of the supraglacial drainage network at Humboldt Glacier, northern Greenland, between 2016 and 2020
Source: Copernicus journal article supplement (doi:10.5194/tc-17-4729-2023), 2023-11-09
Supplement: Supplementary file 1 [file tc-17-4729-2023-supplement.zip]

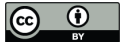

## *Supplement of*

# **Seasonal evolution of the supraglacial drainage network at Humboldt Glacier, northern Greenland, between 2016 and 2020**

**Lauren D. Rawlins et al.**

*Correspondence to:* Lauren D. Rawlins ([lauren.rawlins@york.ac.uk](mailto:lauren.rawlins@york.ac.uk))

- [tc-17-4729-2023-supplement-title-page.pdf](#)
- [supplement](#)
  - [REVISED\\_Supplementary\\_information.docx](#)
  - [REVISED\\_Supplementary\\_information\\_LDR.pdf](#)
  - [Supp\\_Fig01.pdf](#)
  - [Supp\\_Fig02.pdf](#)
  - [Supp\\_Fig03.pdf](#)

The copyright of individual parts of the supplement might differ from the article licence.
