# Supplementary material for: Seasonal evolution of the supraglacial drainage network at Humboldt Glacier, northern Greenland, between 2016 and 2020
Source: Copernicus journal article supplement (doi:10.5194/tc-17-4729-2023), 2023-11-09
Supplement: Supplementary file 4 [file tc-17-4729-2023-supplement.zip]

# Seasonal evolution of the supraglacial drainage network at Humboldt Glacier, North Greenland, between 2016 and 2020

## Supplementary Information

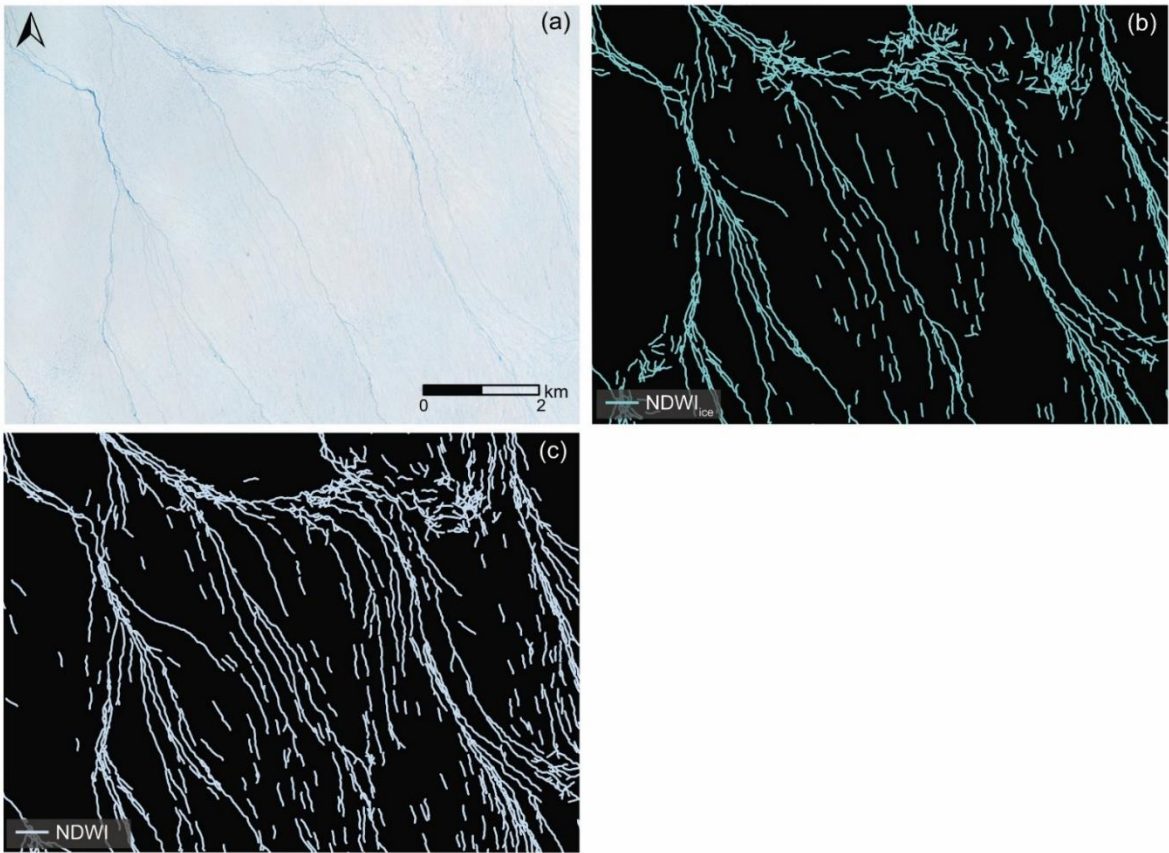

Figure S1. Comparative assessment between  $NDWI_{ice}$  (Yang and Smith, 2013) and  $NDWI$  (McFeeters, 1996). (a) RGB image of the sample area used on Humboldt Glacier for supraglacial river extraction and comparison. This area included both primary, main stem and tributary-river type channels; (b) delineation of supraglacial river channels using the  $NDWI_{ice}$  spectral index, showing instances of channel breaks and less continual forms; (c) delineation of supraglacial river channels using  $NDWI$  (McFeeters, 1996) showing the extraction of more continual river channels which were 16.8% longer than those derived from  $NDWI_{ice}$ , hence its preferred use.

35 Table S1. Details of the various data sources used for this study, including Sentinel-2 imagery sourced from the European Space Agency (ESA) Copernicus Open Access Hub available at <https://scihub.copernicus.eu/> with associated tile IDs (\*tile IDs were downloaded for each of the study dates). Information is also provided for the ArcticDEM 10m tile IDs sourced from the Polar Geospatial Centre available at <https://www.pgc.umn.edu/data/arcticdem/>

| Image Type     | Acquisition Date | Tile ID | Source |
|----------------|------------------|---------|--------|
| Sentinel-2 L1C | 22/05/2016       | T20XMN* | ESA    |
|                |                  | T20XMP* | ESA    |
|                |                  | T20XNN* | ESA    |
|                |                  | T20XNP* | ESA    |
|                | 12/06/2016       |         |        |
|                | 28/06/2016       |         |        |
|                | 08/07/2016       |         |        |
|                | 18/07/2016       |         |        |
|                | 29/07/2016       |         |        |
|                | 07/08/2016       |         |        |
|                | 25/08/2016       |         |        |
|                | 03/09/2016       |         |        |
|                | 30/05/2017       |         |        |
|                | 10/06/2017       |         |        |
|                | 22/06/2017       |         |        |
|                | 06/07/2017       |         |        |
|                | 19/07/2017       |         |        |
|                | 24/07/2017       |         |        |
|                | 06/08/2017       |         |        |
|                | 22/08/2017       |         |        |
|                | 05/09/2017       |         |        |
|                | 15/06/2018       |         |        |
|                | 22/06/2018       |         |        |
|                | 29/06/2018       |         |        |
|                | 05/07/2018       |         |        |
|                | 25/07/2018       |         |        |
|                | 02/08/2018       |         |        |
|                | 20/08/2018       |         |        |

|                        |                                                                                                                                                                                                                                                                        |                                                                               |     |
|------------------------|------------------------------------------------------------------------------------------------------------------------------------------------------------------------------------------------------------------------------------------------------------------------|-------------------------------------------------------------------------------|-----|
|                        | 17/05/2019<br>04/06/2019<br>24/06/2019<br>30/06/2019<br>07/07/2019<br>17/07/2019<br>27/07/2019<br>05/08/2019<br>13/08/2019<br>02/09/2019<br>15/06/2020<br>23/06/2020<br>28/06/2020<br>25/07/2020<br>30/07/2020<br>07/08/2020<br>17/08/2020<br>29/08/2020<br>05/09/2020 |                                                                               |     |
| <b>ArcticDEM (10m)</b> |                                                                                                                                                                                                                                                                        | 28_36<br>28_37<br>28_38<br>29_36<br>29_37<br>29_38<br>30_36<br>30_37<br>30_38 | PGC |

**Table S2. Table showing the satellite-derived water metrics and extracted MAR melt production and runoff values for each study date across the study period (2016 – 2020)**

45

| <b>Date</b>       | <b>Meltwater<br/>Area<br/>(km<sup>2</sup>)</b> | <b>Meltwater<br/>Area Fraction<br/>(%)</b> | <b>Drainage<br/>Density<br/>(D<sub>d</sub>)</b> | <b>River<br/>Fraction<br/>(%)</b> | <b>No.<br/>Lakes</b> | <b>Lake<br/>Size<br/>(km<sup>2</sup>)</b> | <b>Lake<br/>Fraction<br/>(%)</b> | <b>Daily RCM<br/>Surface<br/>Runoff (mm<br/>w.e d<sup>-1</sup>)</b> | <b>Cumulative<br/>MAR Runoff<br/>(mm w.e d<sup>-1</sup>)</b> |
|-------------------|------------------------------------------------|--------------------------------------------|-------------------------------------------------|-----------------------------------|----------------------|-------------------------------------------|----------------------------------|---------------------------------------------------------------------|--------------------------------------------------------------|
| <b>2016-05-22</b> | 17.48                                          | 0.13                                       | 0.06                                            | 0.13                              | 0                    | 0                                         | 0                                | 0.01                                                                | 0.69                                                         |
| <b>2016-06-12</b> | 419.08                                         | 3.11                                       | 1.78                                            | 3.11                              | 0                    | 0                                         | 0                                | 1.97                                                                | 3.82                                                         |
| <b>2016-06-28</b> | 1538.60                                        | 11.41                                      | 5.88                                            | 11.28                             | 73                   | 17.40                                     | 0.13                             | 7.12                                                                | 59.96                                                        |
| <b>2016-07-08</b> | 1533.06                                        | 11.37                                      | 6.39                                            | 11.22                             | 53                   | 19.10                                     | 0.14                             | 14.74                                                               | 180.89                                                       |
| <b>2016-07-18</b> | 1539.78                                        | 11.42                                      | 6.46                                            | 11.30                             | 48                   | 15.53                                     | 0.12                             | 15.70                                                               | 338.05                                                       |
| <b>2016-07-29</b> | 1021.35                                        | 7.57                                       | 4.02                                            | 7.46                              | 37                   | 15.12                                     | 0.11                             | 7.44                                                                | 531.41                                                       |
| <b>2016-08-07</b> | 639.77                                         | 4.74                                       | 2.6                                             | 4.71                              | 13                   | 4.90                                      | 0.04                             | 2.90                                                                | 624.71                                                       |
| <b>2016-08-25</b> | 197.79                                         | 1.47                                       | 0.77                                            | 1.45                              | 6                    | 2.03                                      | 0.02                             | 0.22                                                                | 659.19                                                       |
| <b>2016-09-03</b> | 122.24                                         | 0.91                                       | 0.52                                            | 0.91                              | 0                    | 0                                         | 0                                | 0.04                                                                | 662.11                                                       |
| <b>2017-05-30</b> | 10.69                                          | 0.08                                       | 0.04                                            | 0.08                              | 0                    | 0                                         | 0                                | 0.03                                                                | 0.37                                                         |
| <b>2017-06-10</b> | 15.13                                          | 0.11                                       | 0.05                                            | 0.11                              | 0                    | 0                                         | 0                                | 0.01                                                                | 0.60                                                         |
| <b>2017-06-22</b> | 28.61                                          | 0.21                                       | 0.1                                             | 0.21                              | 0                    | 0                                         | 0                                | 1.92                                                                | 6.98                                                         |
| <b>2017-07-06</b> | 131.89                                         | 0.98                                       | 0.49                                            | 0.96                              | 15                   | 1.98                                      | 0.01                             | 3.56                                                                | 38.05                                                        |
| <b>2017-07-19</b> | 349.65                                         | 2.59                                       | 1.32                                            | 2.49                              | 53                   | 13.31                                     | 0.10                             | 3.82                                                                | 98.65                                                        |
| <b>2017-07-24</b> | 1039.68                                        | 7.71                                       | 4.24                                            | 7.59                              | 54                   | 15.81                                     | 0.12                             | 5.68                                                                | 124.22                                                       |
| <b>2017-08-06</b> | 1247.27                                        | 9.25                                       | 5.01                                            | 9.13                              | 46                   | 15.30                                     | 0.11                             | 4.03                                                                | 255.56                                                       |
| <b>2017-08-22</b> | 1373.33                                        | 10.18                                      | 5.33                                            | 10.18                             | 1                    | 0.15                                      | 0                                | 0.28                                                                | 322.40                                                       |
| <b>2017-09-05</b> | 195.25                                         | 1.45                                       | 0.75                                            | 1.45                              | 0                    | 0                                         | 0                                | 0.01                                                                | 322.89                                                       |
| <b>2018-06-15</b> | 16.72                                          | 0.12                                       | 0.06                                            | 0.12                              | 0                    | 0                                         | 0                                | 0.53                                                                | 2.15                                                         |
| <b>2018-06-22</b> | 86.23                                          | 0.64                                       | 0.32                                            | 0.64                              | 0                    | 0                                         | 0                                | 1.01                                                                | 9.66                                                         |
| <b>2018-06-29</b> | 230.75                                         | 1.71                                       | 0.88                                            | 1.70                              | 12                   | 1.48                                      | 0.01                             | 4.28                                                                | 27.74                                                        |
| <b>2018-07-05</b> | 365.10                                         | 2.71                                       | 1.38                                            | 2.64                              | 48                   | 8.69                                      | 0.06                             | 4.74                                                                | 55.03                                                        |
| <b>2018-07-25</b> | 384.60                                         | 2.85                                       | 1.42                                            | 2.77                              | 38                   | 11.29                                     | 0.08                             | 0.79                                                                | 111.69                                                       |
| <b>2018-08-02</b> | 905.39                                         | 6.71                                       | 3.46                                            | 6.56                              | 74                   | 20.08                                     | 0.15                             | 7.09                                                                | 141.68                                                       |
| <b>2018-08-20</b> | 965.73                                         | 7.16                                       | 3.76                                            | 7.12                              | 20                   | 5.20                                      | 0.04                             | 2.23                                                                | 235.51                                                       |
| <b>2019-05-17</b> | 18.43                                          | 0.14                                       | 0                                               | 0.14                              | 0                    | 0                                         | 0                                | 0.05                                                                | 0.88                                                         |
| <b>2019-06-04</b> | 136.99                                         | 1.02                                       | 0.09                                            | 1.02                              | 0                    | 0                                         | 0                                | 0.05                                                                | 1.83                                                         |

|            |         |       |      |       |     |       |      |       |        |
|------------|---------|-------|------|-------|-----|-------|------|-------|--------|
| 2019-06-24 | 636.04  | 4.72  | 0.36 | 4.51  | 108 | 27.65 | 0.20 | 1.18  | 100.54 |
| 2019-06-30 | 2684.99 | 19.91 | 6.79 | 19.70 | 111 | 27.35 | 0.20 | 19.37 | 147.26 |
| 2019-07-07 | 1659.37 | 12.30 | 6.52 | 12.13 | 95  | 22.61 | 0.17 | 21.46 | 286.49 |
| 2019-07-17 | 1870.99 | 13.87 | 7.36 | 13.70 | 79  | 23.11 | 0.17 | 16.80 | 473.14 |
| 2019-07-27 | 1566.27 | 11.61 | 6.23 | 11.49 | 45  | 16.77 | 0.12 | 12.62 | 617.05 |
| 2019-08-05 | 1031.83 | 7.65  | 4.05 | 7.53  | 45  | 16.73 | 0.12 | 11.22 | 764.95 |
| 2019-08-13 | 1595.78 | 11.83 | 6.6  | 11.71 | 41  | 16.48 | 0.12 | 8.20  | 858.76 |
| 2019-09-02 | 1506.69 | 11.17 | 6.5  | 11.16 | 3   | 1.08  | 0.01 | 0.78  | 924.32 |
| 2020-06-15 | 1572.85 | 11.66 | 6.44 | 11.58 | 57  | 11.19 | 0.08 | 0.57  | 6.36   |
| 2020-06-23 | 526.47  | 3.90  | 2.07 | 3.77  | 63  | 17.78 | 0.13 | 6.94  | 36.46  |
| 2020-06-28 | 1637.63 | 12.14 | 6.69 | 12.02 | 70  | 16.10 | 0.12 | 19.60 | 102.56 |
| 2020-07-25 | 1213.84 | 9.00  | 4.82 | 8.91  | 43  | 12.53 | 0.09 | 14.57 | 572.35 |
| 2020-07-30 | 560.86  | 4.16  | 2.19 | 4.10  | 37  | 8.30  | 0.06 | 11.41 | 642.56 |
| 2020-08-07 | 312.61  | 2.32  | 1.21 | 2.30  | 8   | 2.08  | 0.02 | 1.16  | 681.21 |
| 2020-08-17 | 349.44  | 2.59  | 1.44 | 2.58  | 3   | 1.01  | 0.01 | 0.95  | 694.33 |
| 2020-08-29 | 371.43  | 2.75  | 1.43 | 2.75  | 2   | 0.78  | 0.01 | 0.29  | 751.94 |
| 2020-09-05 | 156.02  | 1.16  | 0.64 | 1.16  | 0   | 0     | 0    | 0.01  | 752.52 |

50

55

60

65  
70  
75  
80  
85  
90

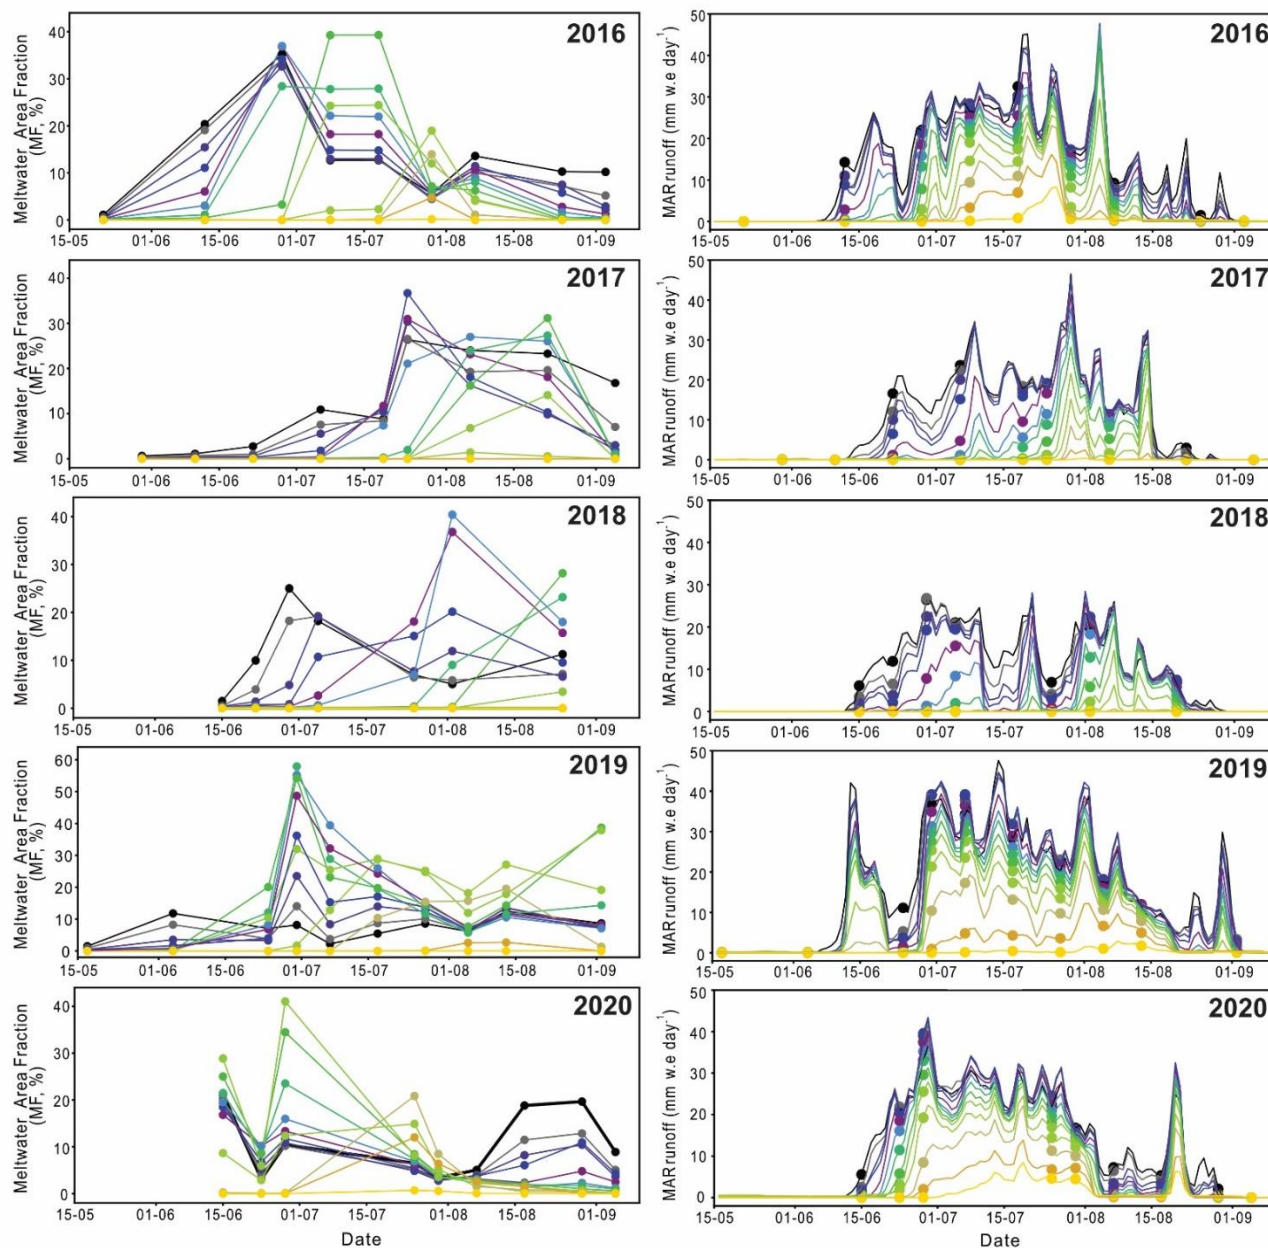

**Figure S2. Meltwater area fraction (%) and MAR runoff (mm w.e day<sup>-1</sup>) per 100 m contour band from 200 m a.s.l to 1500 m a.s.l (conservative limit of maximum mapped network extent) across the Humboldt Glacier catchment for each mapped date across the study period**



100

105

110

115

120

125

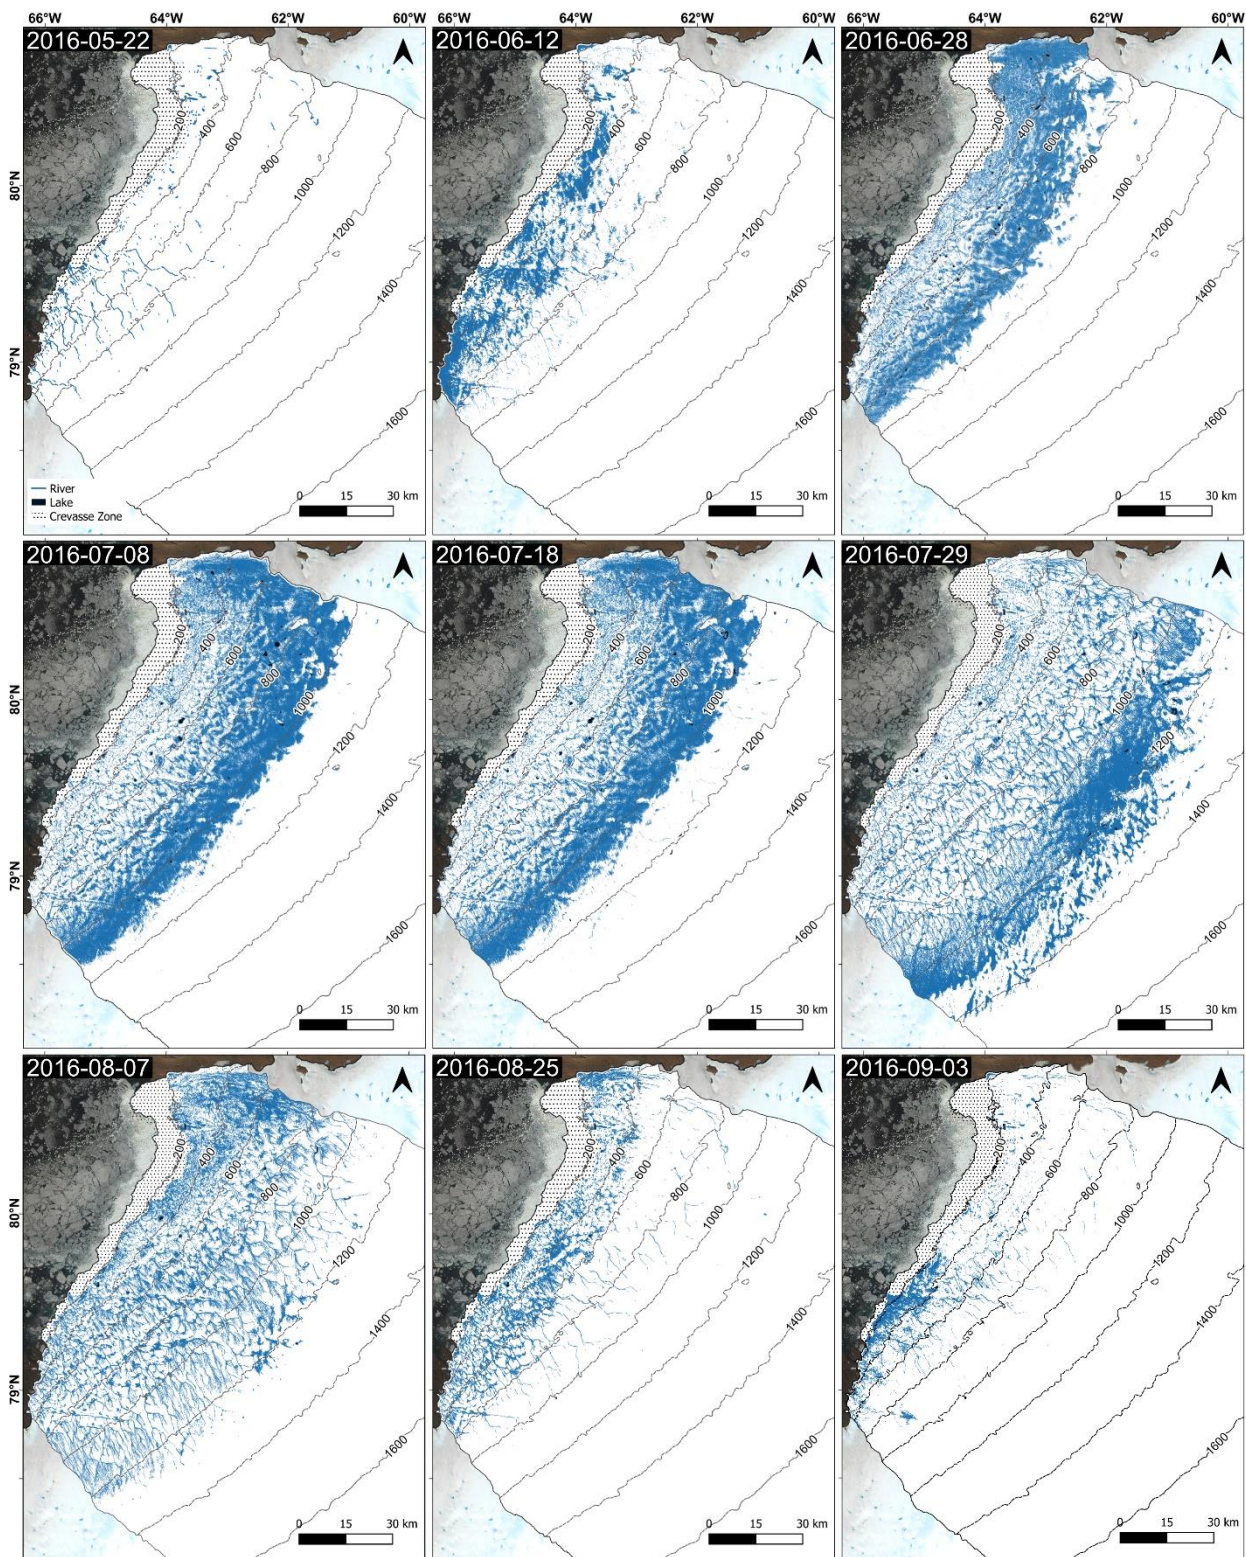











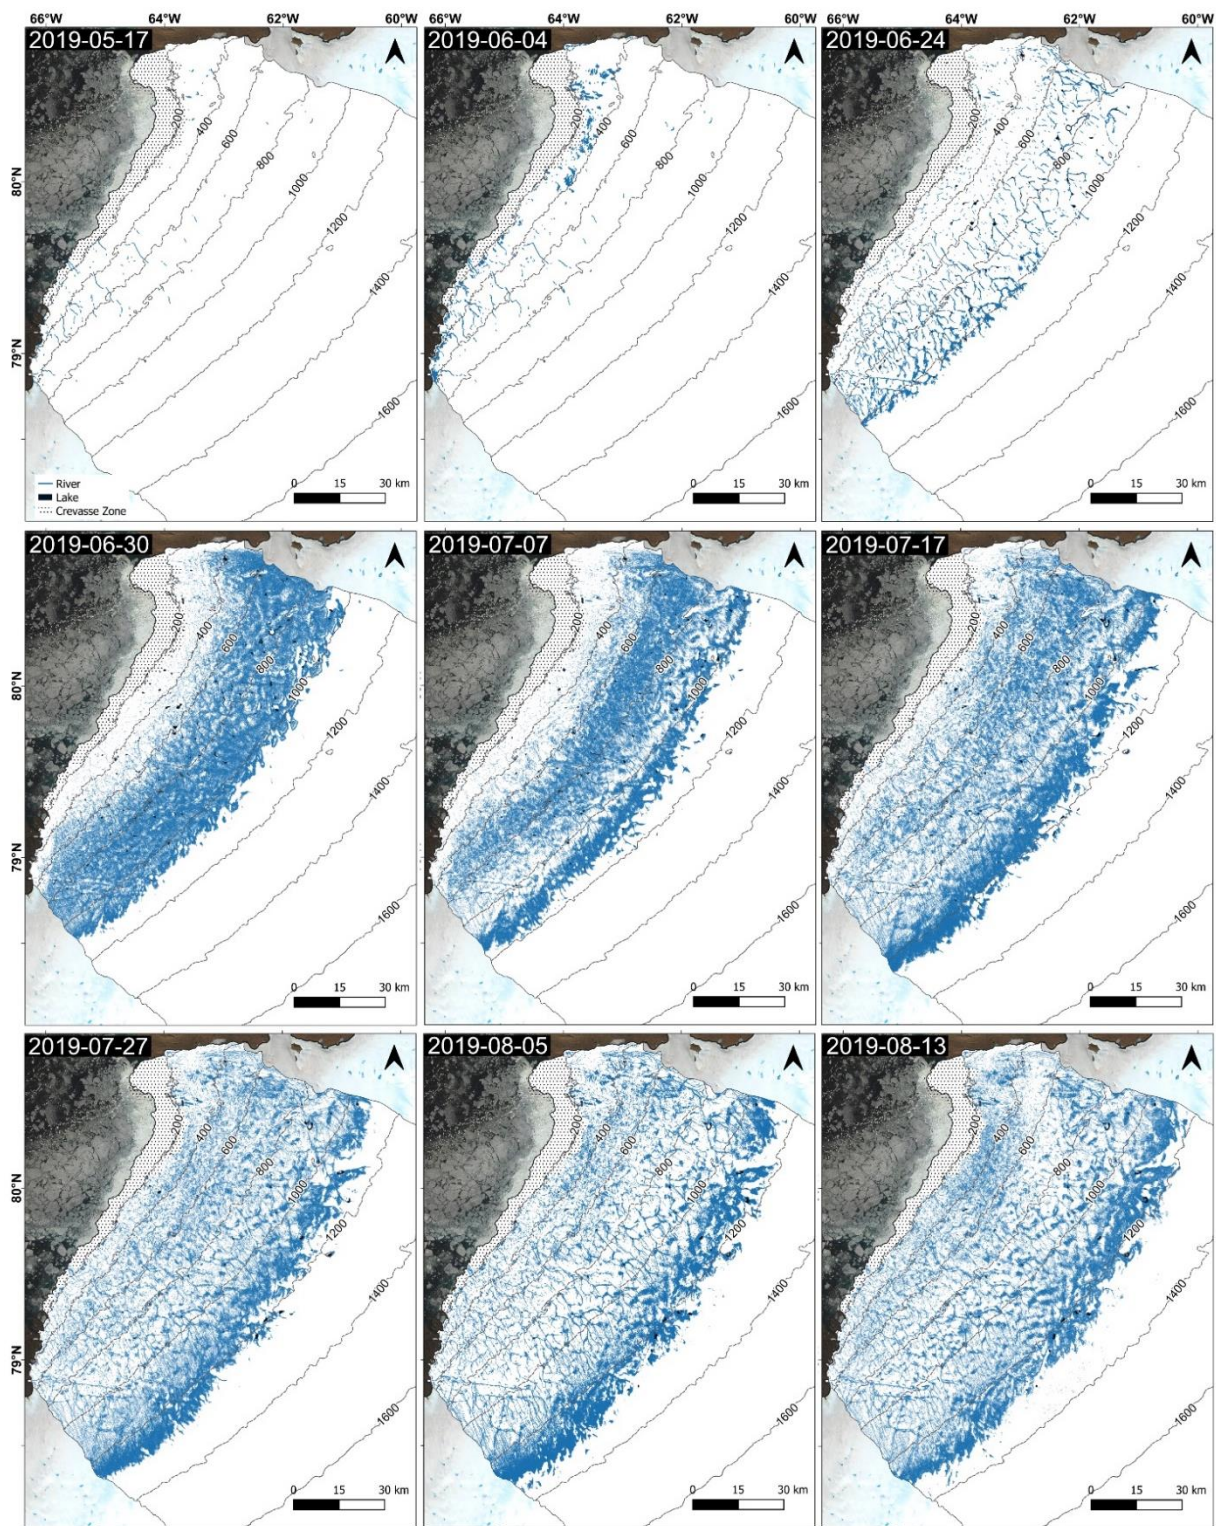



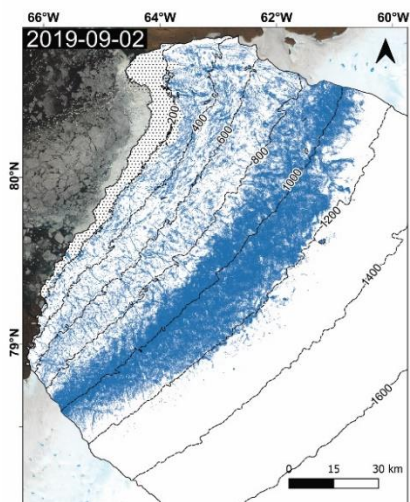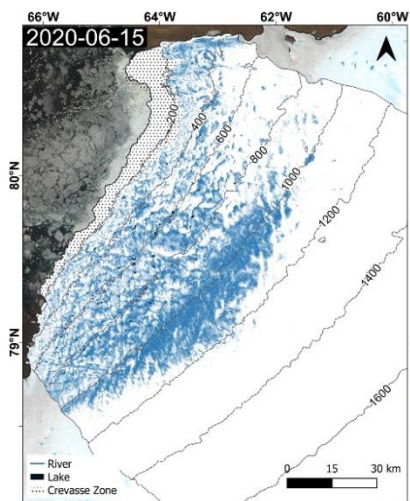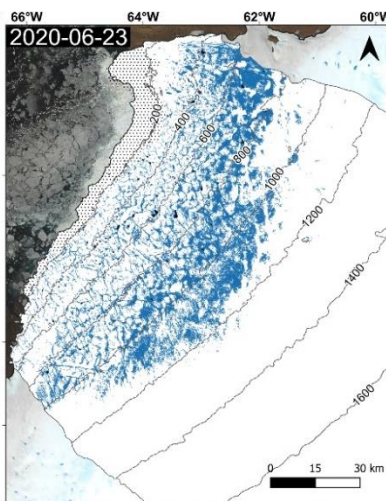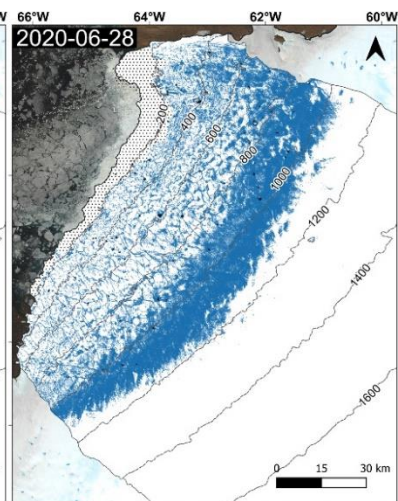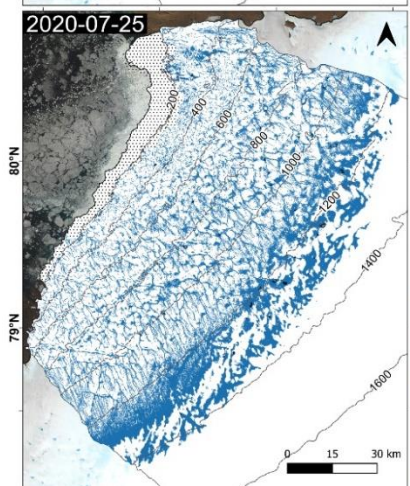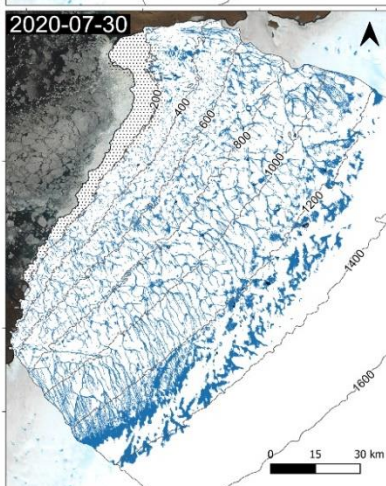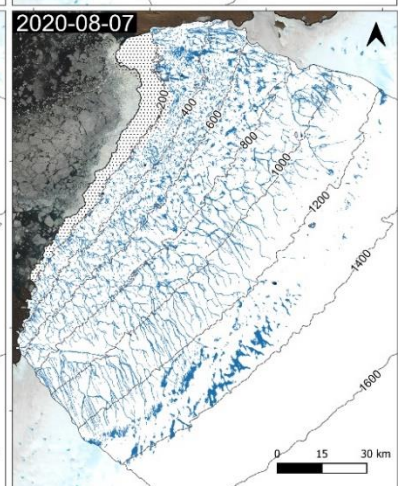

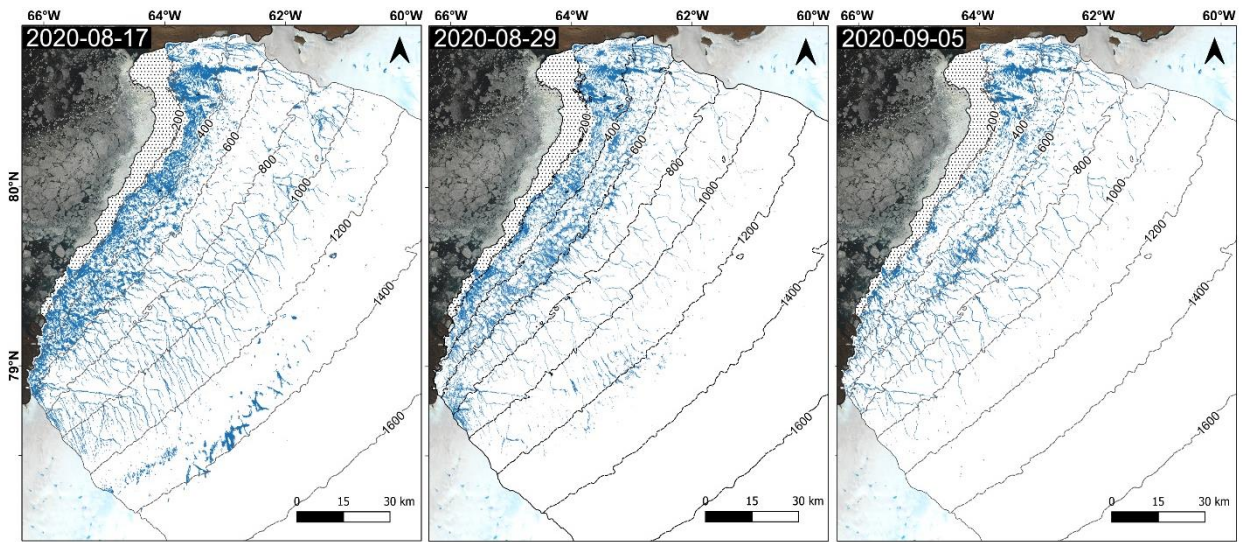

**Figure S3. Supraglacial drainage network maps for all mapped study dates between 2016 – 2020. Blue lines represent delineated supraglacial rivers, black polygons represent SGLs ( $>0.1 \text{ km}^2$ ) and the crevasse zone within the lower 25 km of the glacier is denoted by black and white dots. Elevation contours extracted from the 10 m ArcticDEM mosaic are presented for every 200 m a.s.l. up to 1600 m a.s.l. The background Sentinel-2 image is courtesy of the Copernicus Open Access Hub (<https://scihub.copernicus.eu>).**
