# Supplementary figures and images for: Seasonal evolution of the supraglacial drainage network at Humboldt Glacier, northern Greenland, between 2016 and 2020
Source: Copernicus journal article supplement (doi:10.5194/tc-17-4729-2023), 2023-11-09

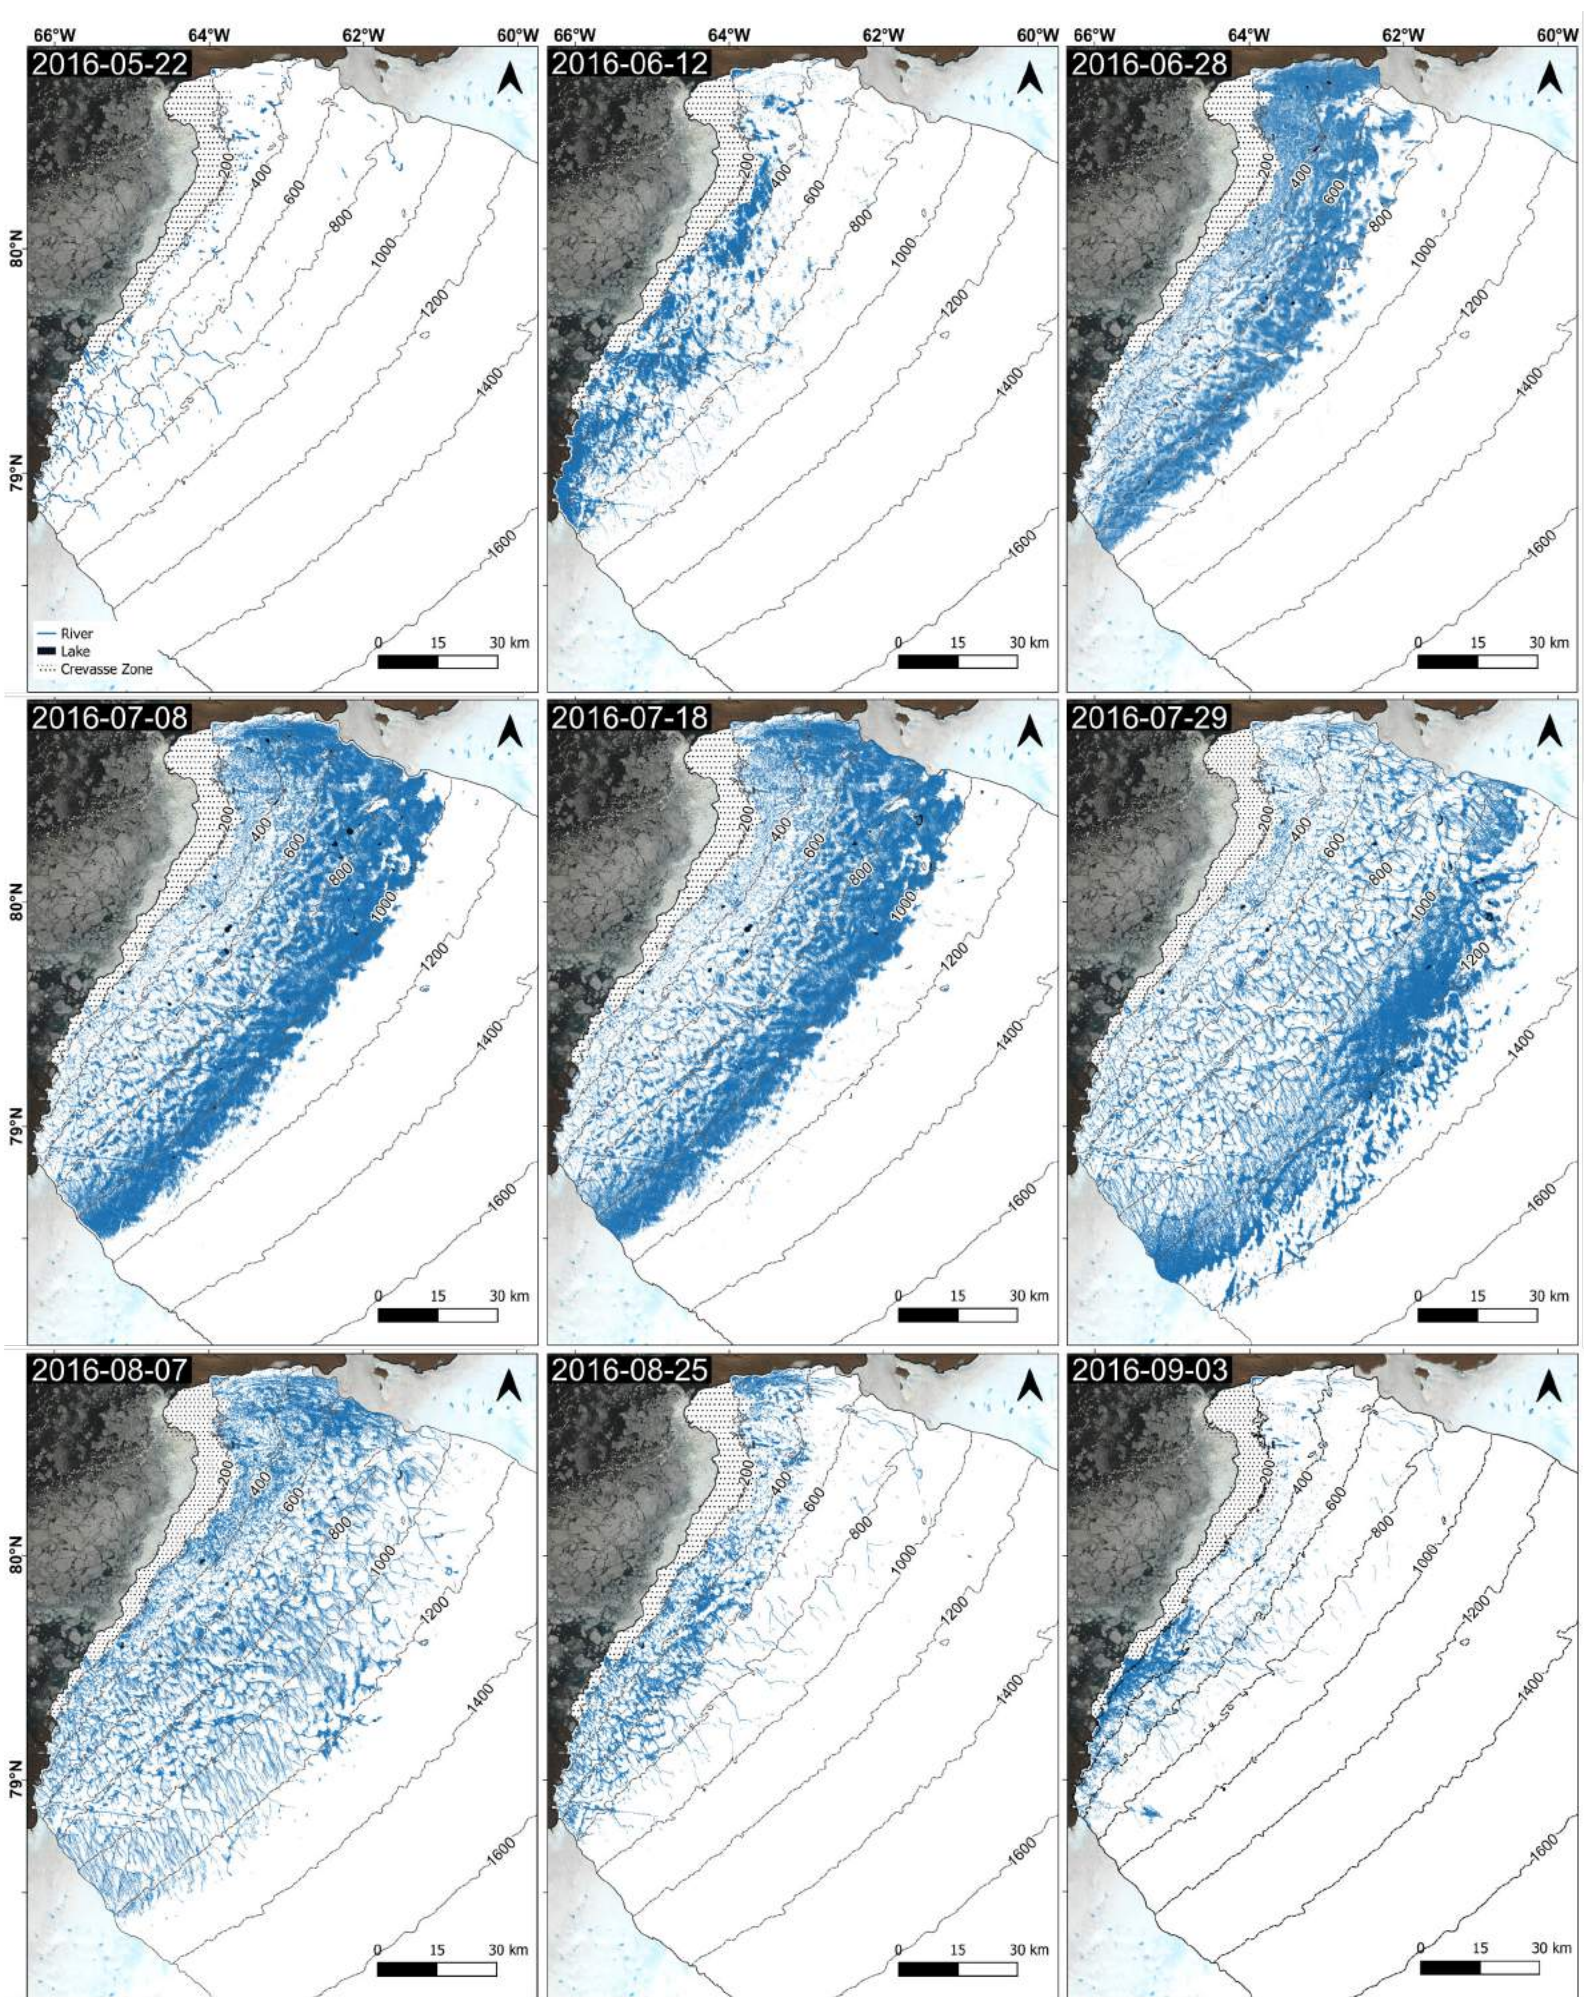



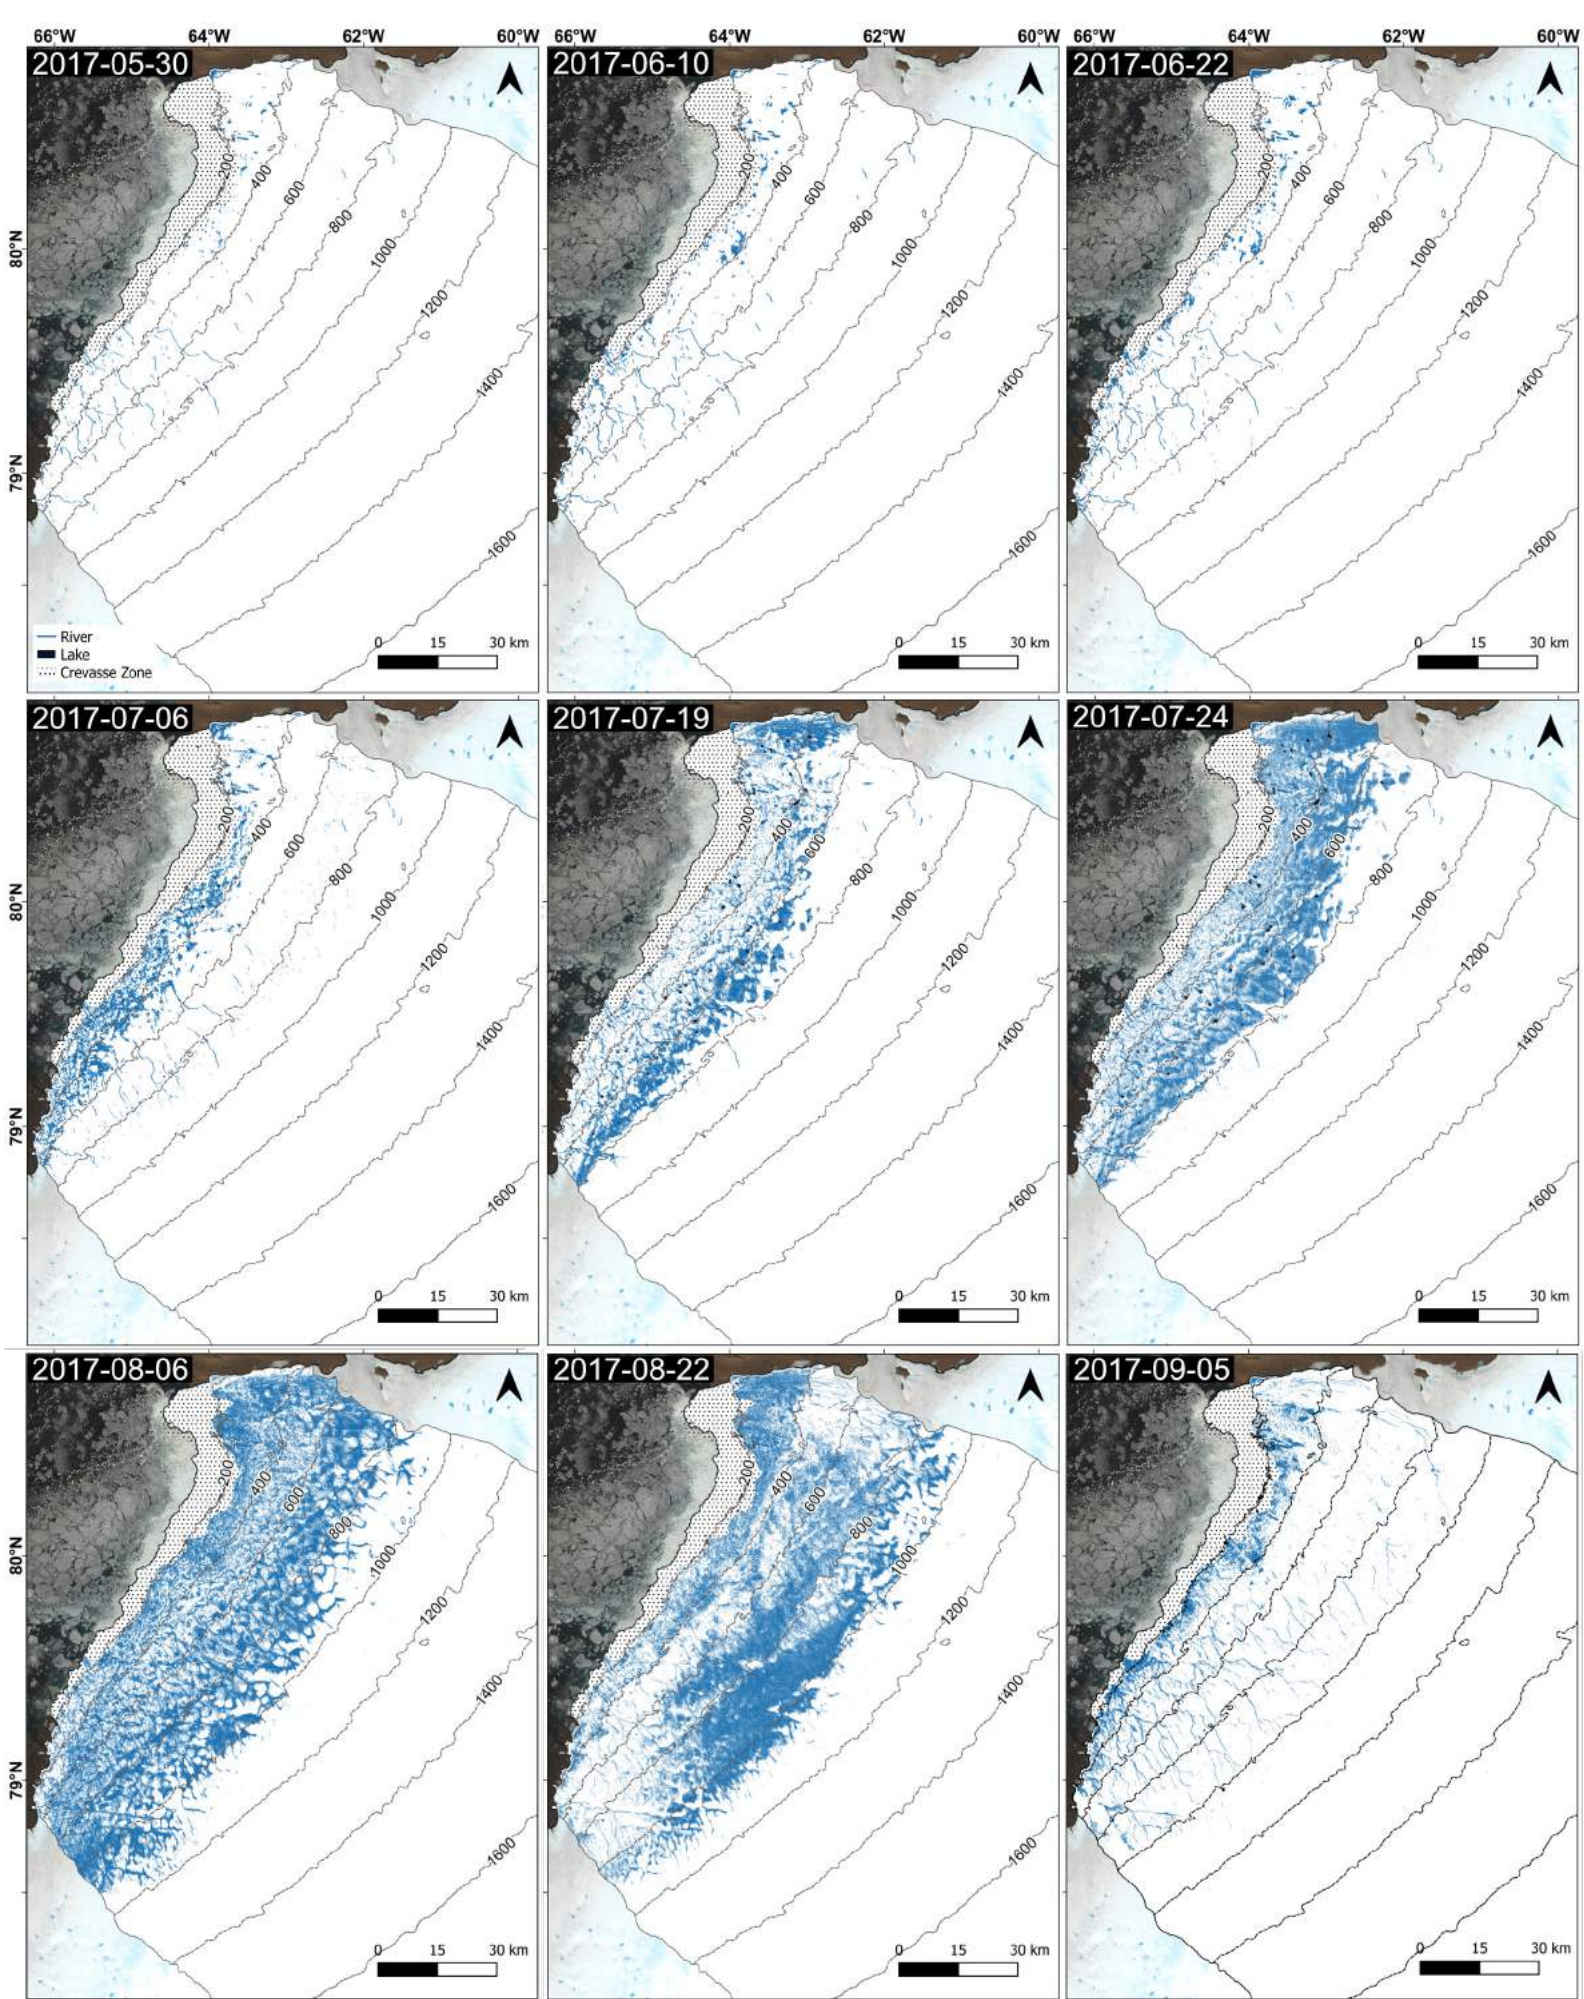



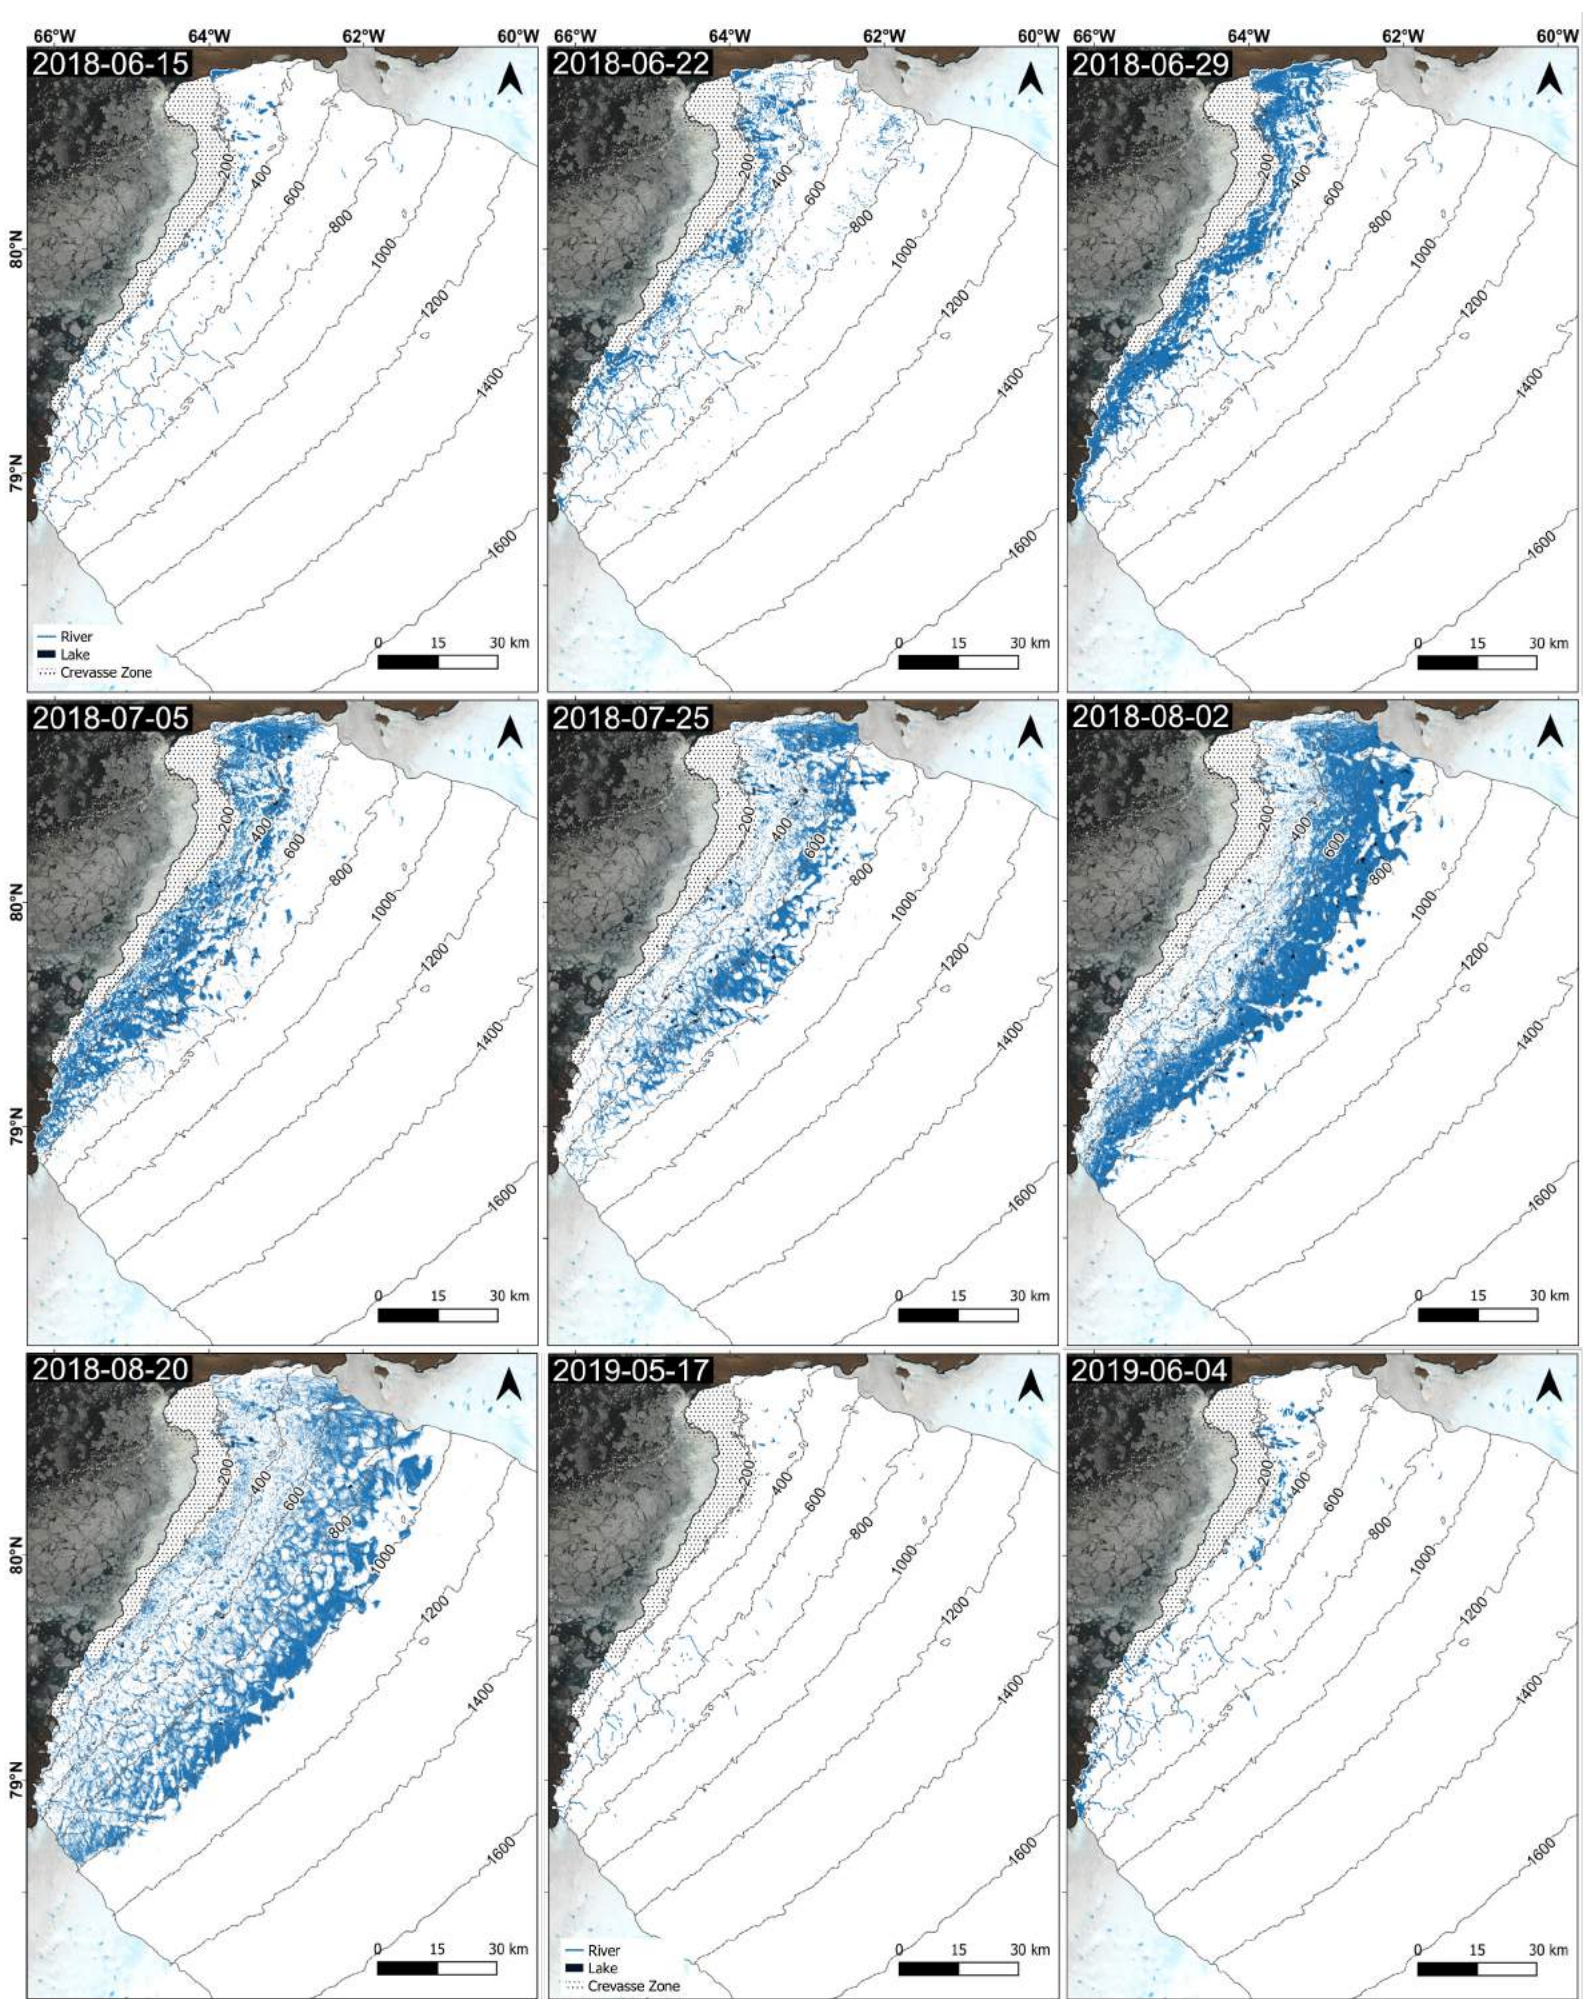



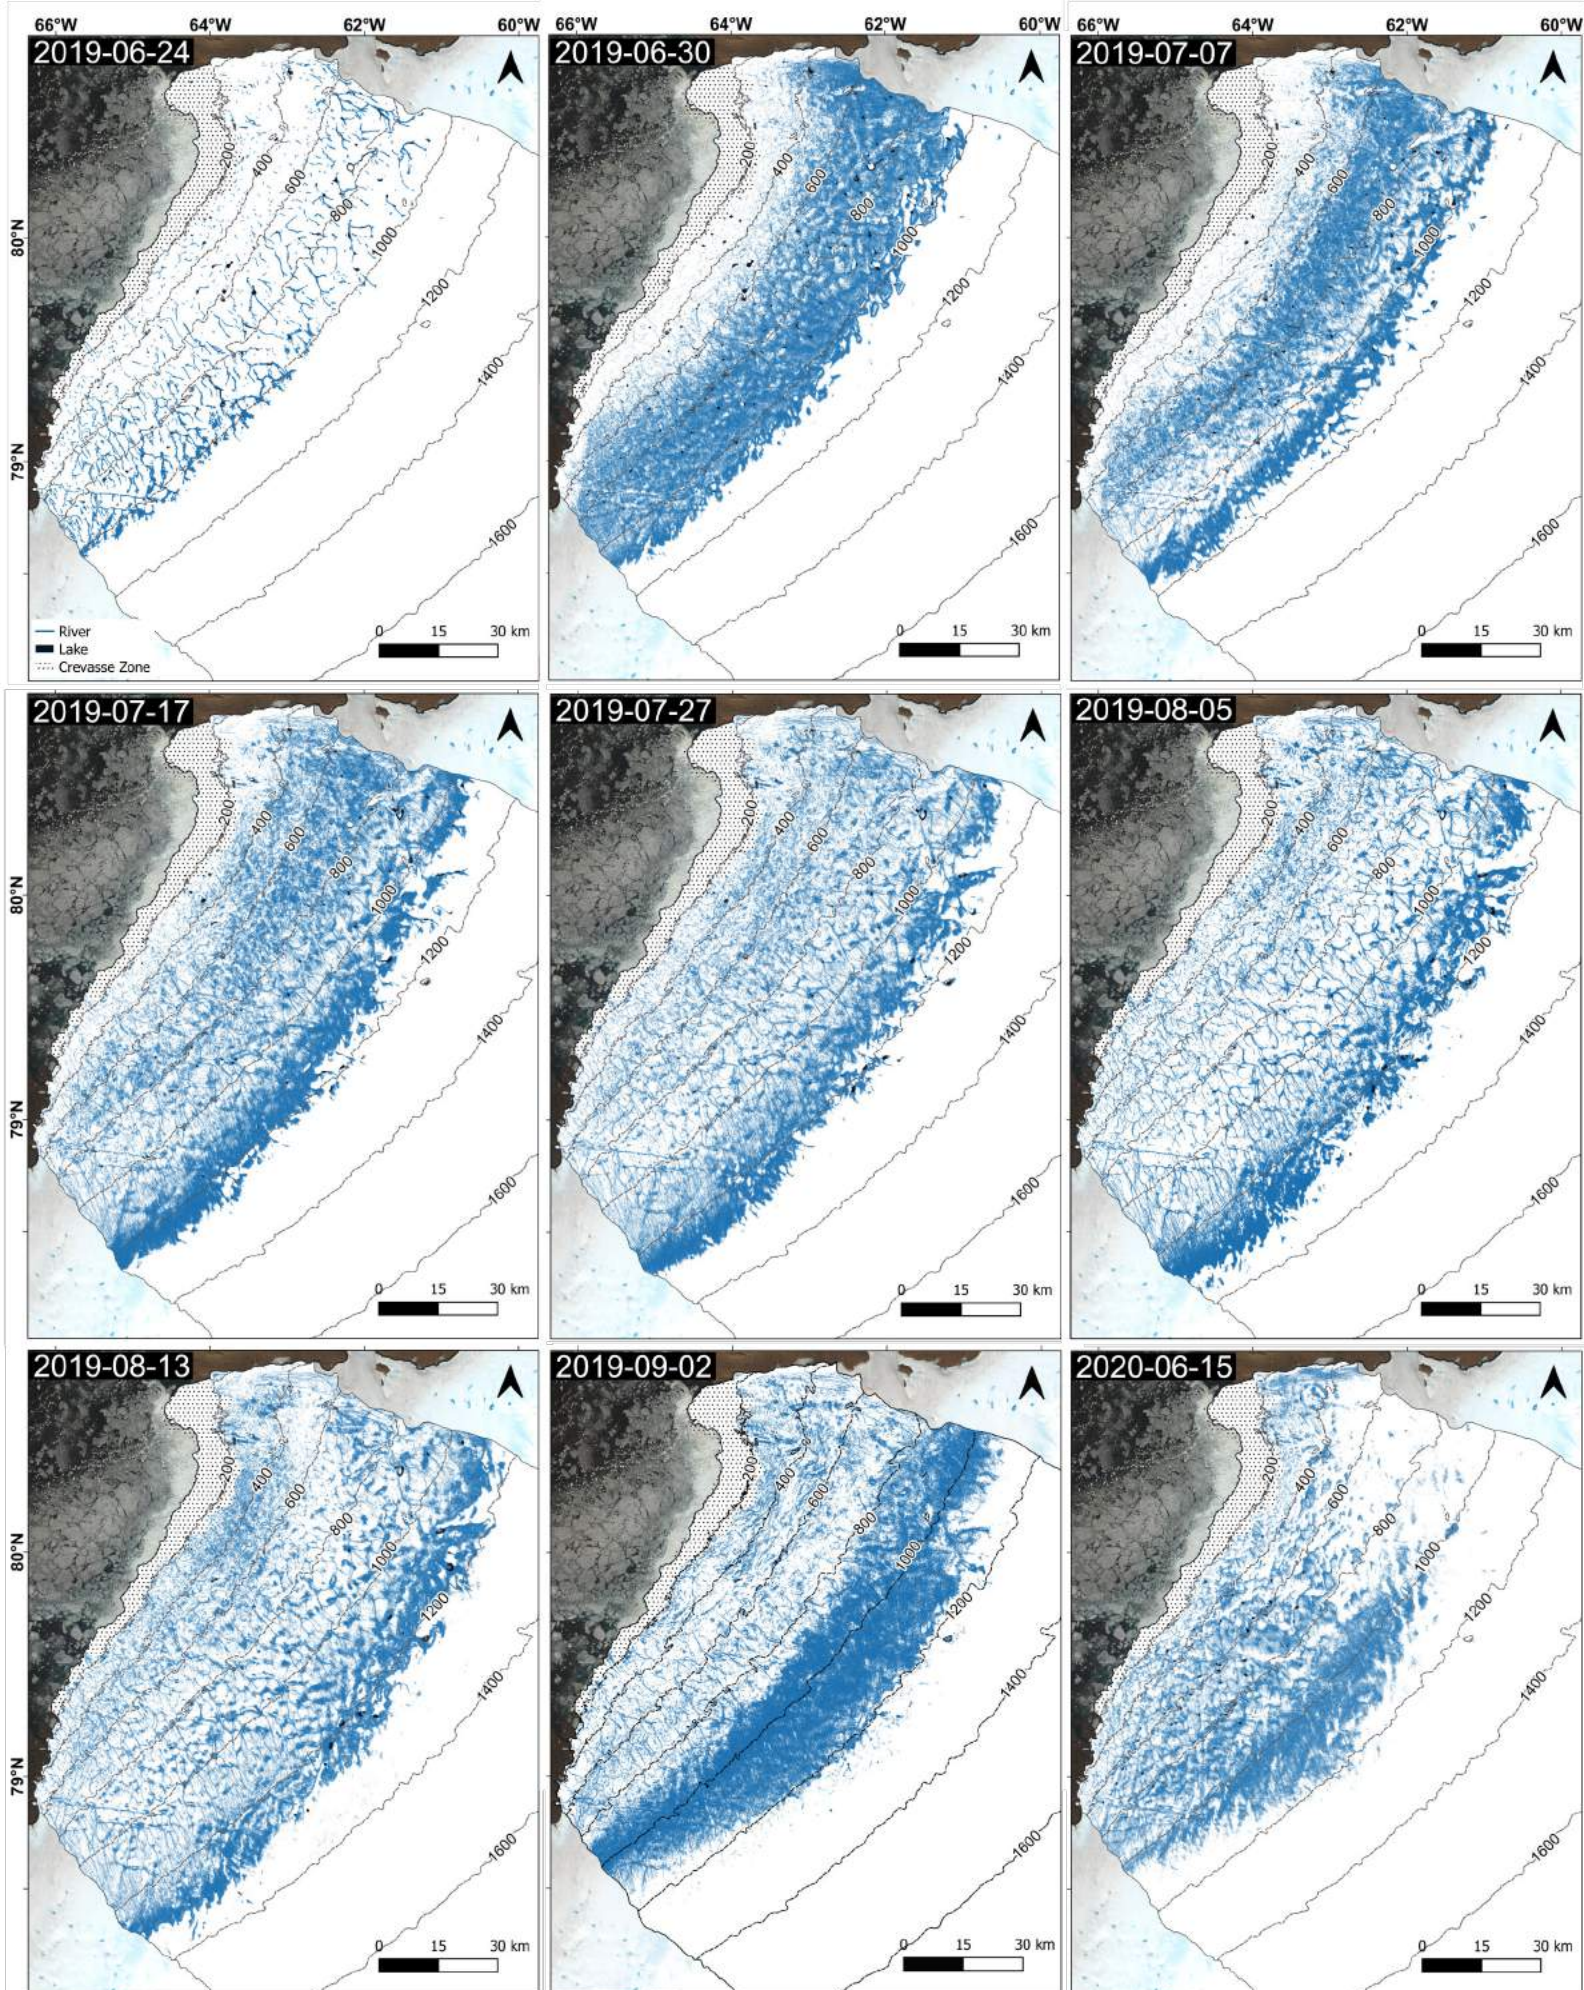



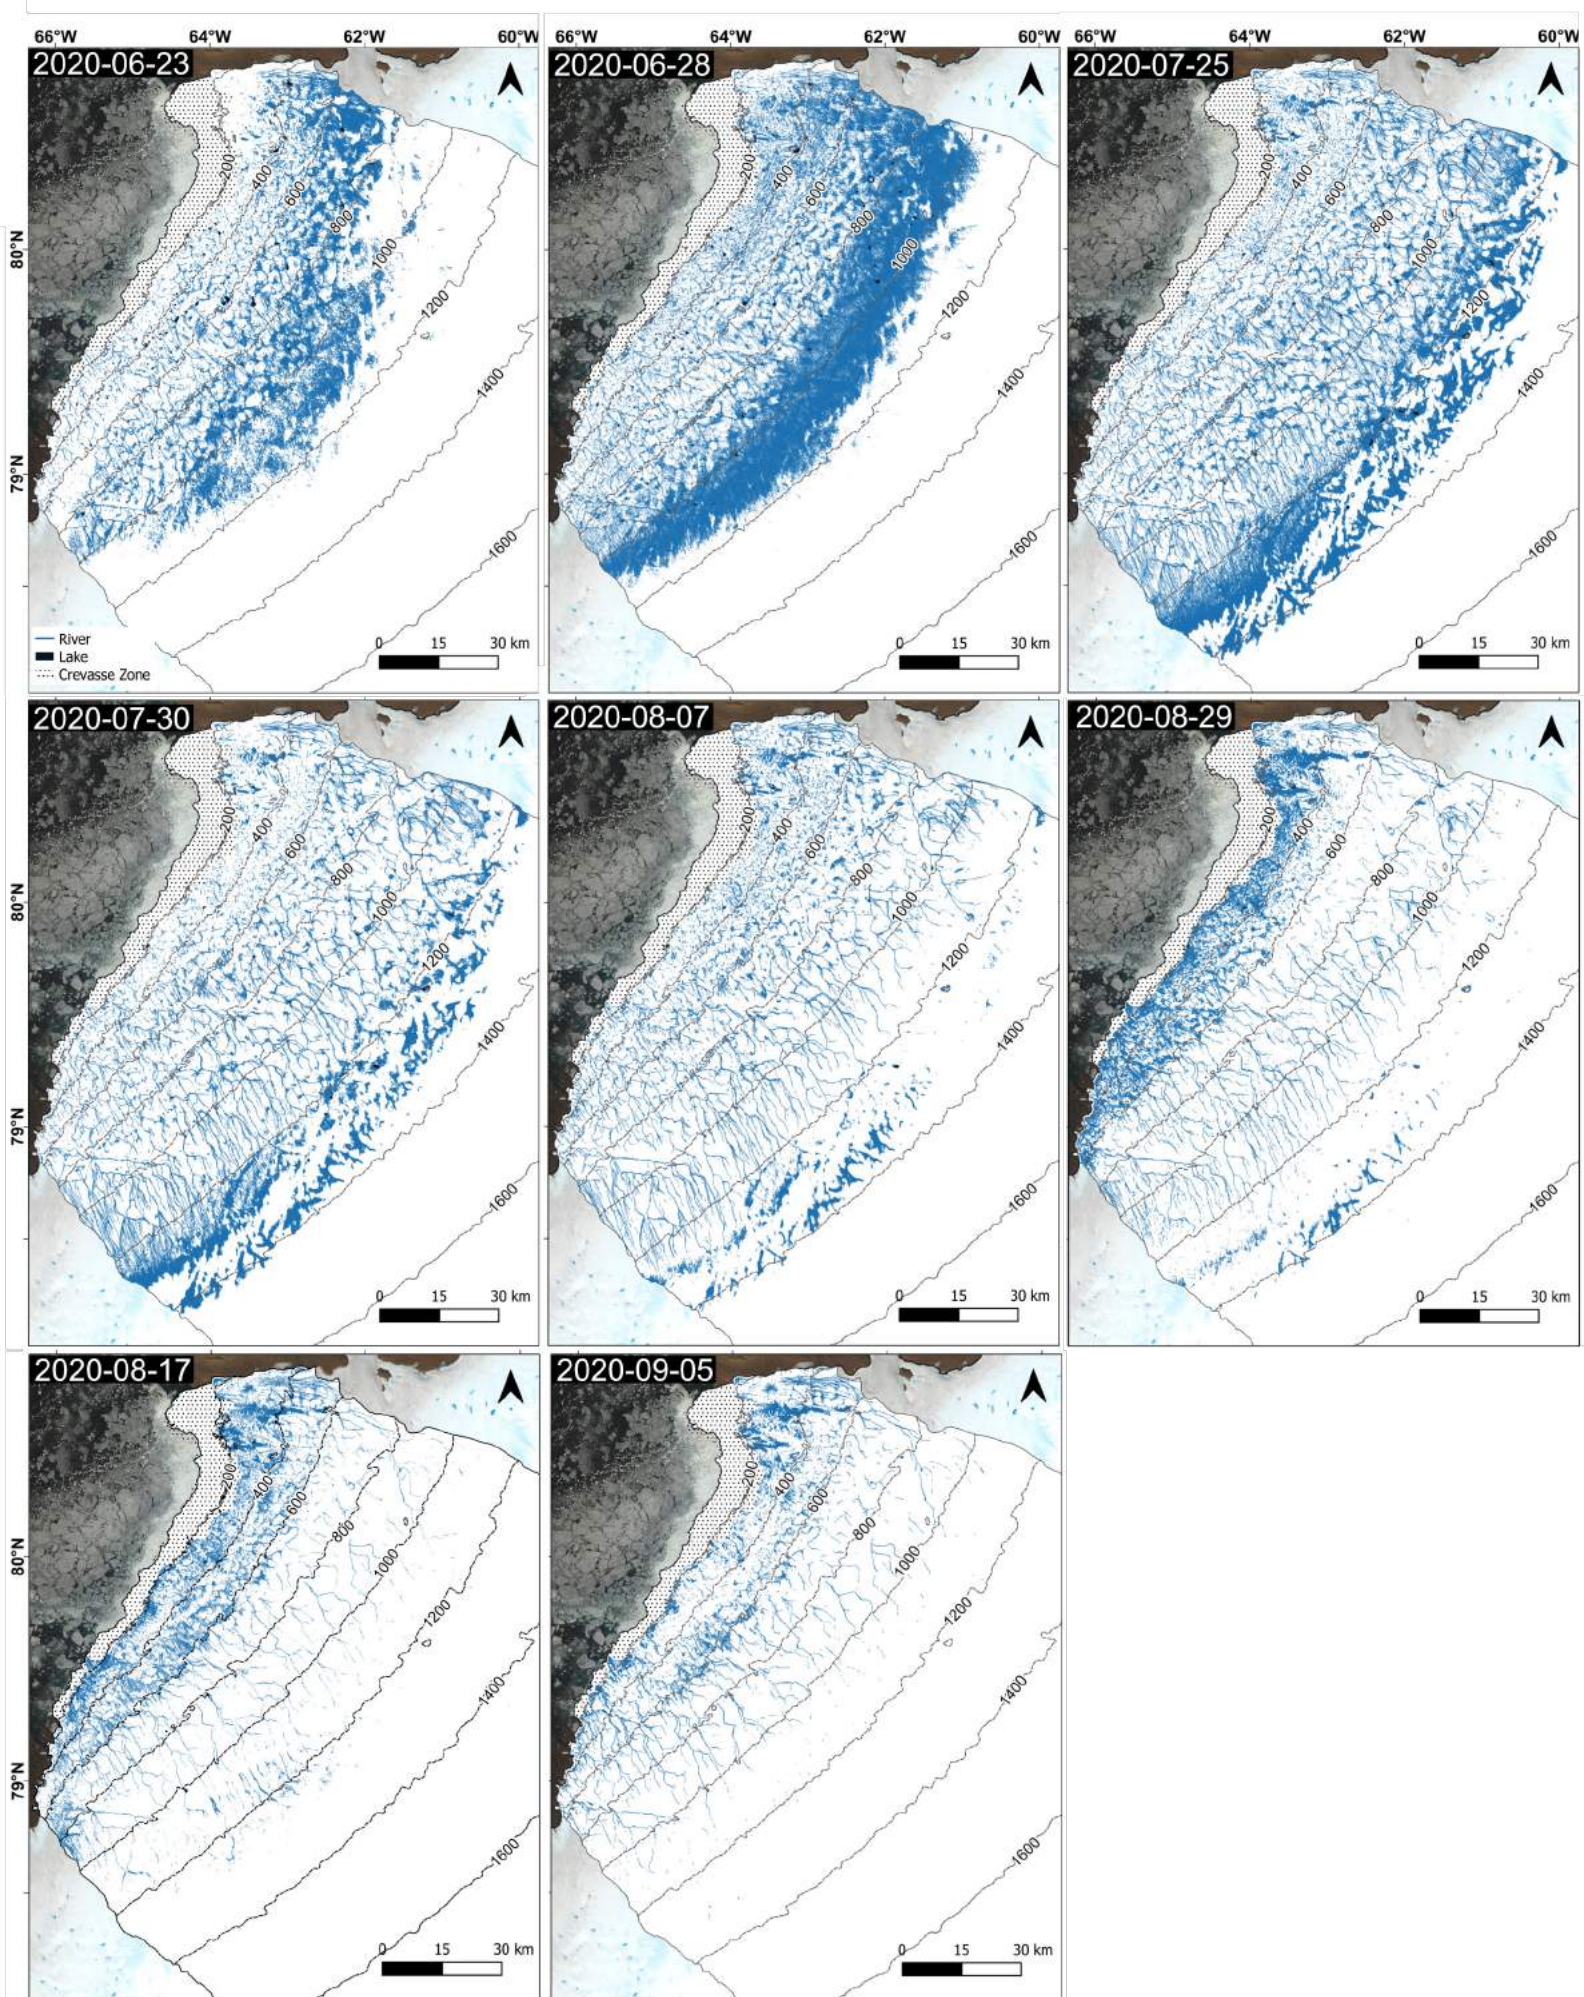

Supplement: Supplementary file 2 [file tc-17-4729-2023-supplement.zip]

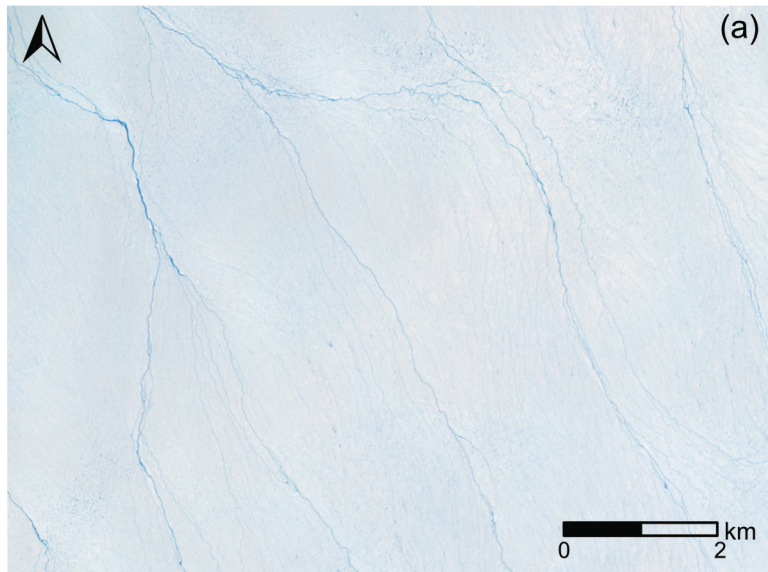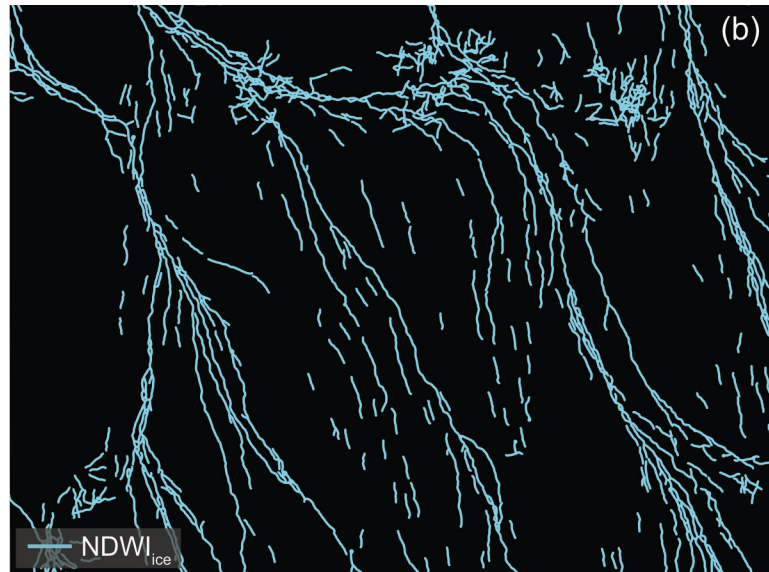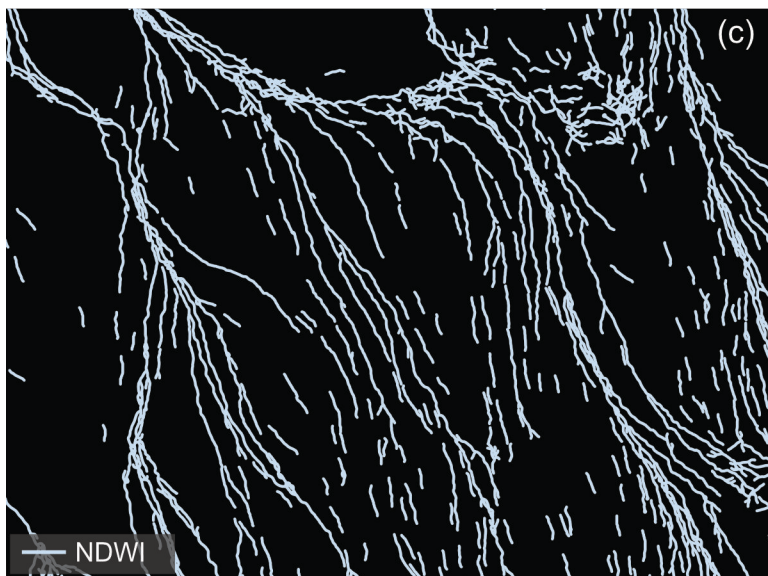

Supplement: Supplementary file 3 [file tc-17-4729-2023-supplement.zip]

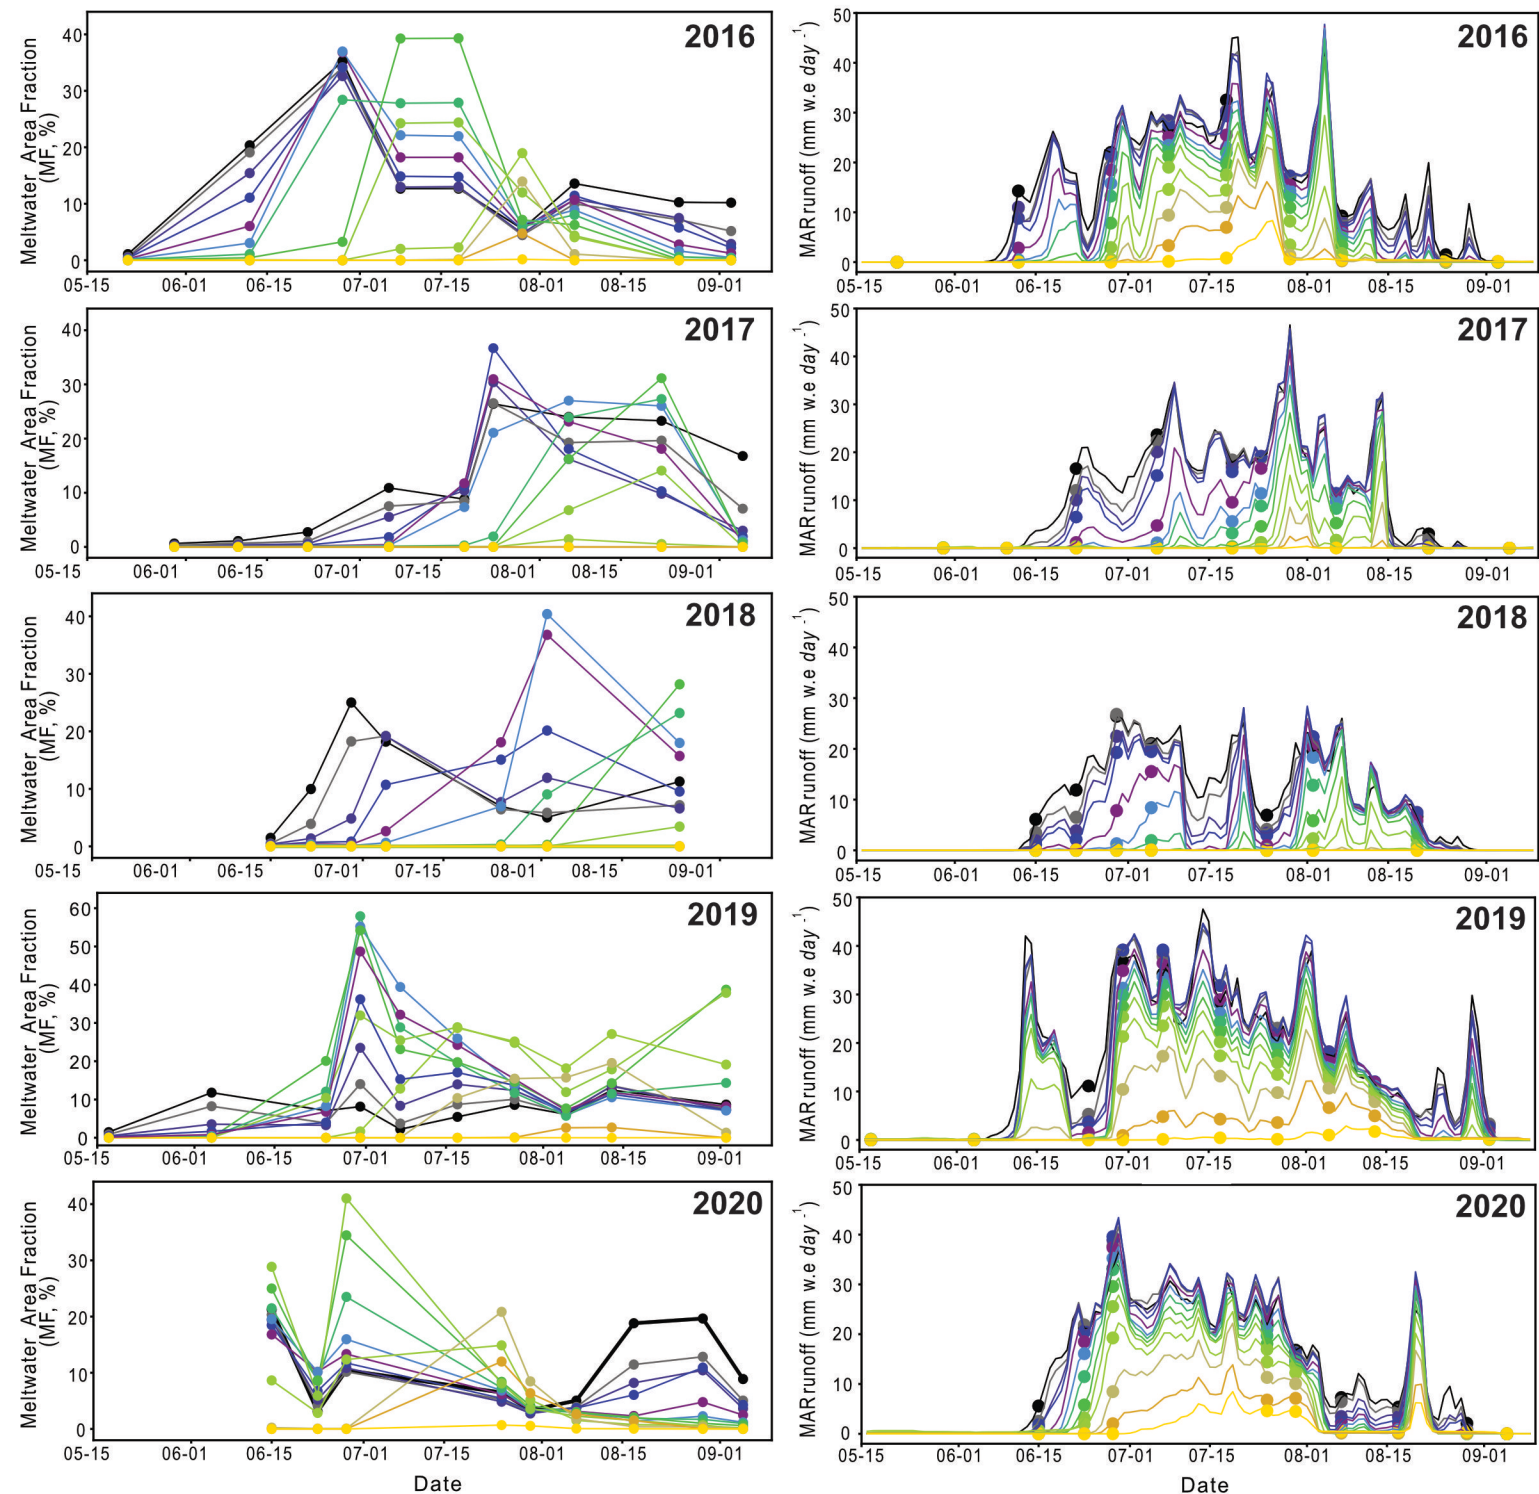

Supplement: Supplementary file 5 [file tc-17-4729-2023-supplement.zip]
